1 **Age-related macular degeneration-like phenotypic features develop at the early ages of**  
2 **Cxcr5/Nrf2 double knockout mice: An accelerated AMD model**

3

4 Hu Huang\* and Anton Lennikov

5

6 Mason Eye Institute, Department of Ophthalmology, University of Missouri School of Medicine, -  
7 Columbia, Missouri, United States of America

8

9 **Keywords:** Age-related macular degeneration;  $\beta$ -Amyloid; Inflammation; Cxcr5; Retinal  
10 degeneration; Retinal pigment epithelium;

11

12 \*Correspondence:

13 Hu Huang, PhD

14 Department of Ophthalmology

15 University of Missouri School of Medicine

16 Columbia

17 1 Hospital Drive, MA102C

18 Columbia, MO 65212, USA

19 Phone: 573-882-9899

20 [huangh1@missouri.edu](mailto:huangh1@missouri.edu)

21

22 ORCID

23 Author 1: Hu Huang ORCID: 0000-0003-2843-0320

24 Author 2: Anton Lennikov ORCID: 0000-0001-8625-1211

25

26

27

28

29 **Summary Statement:**

30 A new animal model is developed to mimic early AMD characteristics in adult mice

31 **Abstract**

32 Age-related macular degeneration (AMD) is a leading cause of blindness for older adults. The aim of  
33 this study is to develop an accelerated mouse model of AMD and characterize its phenotypic features.  
34 *Cxcr5* knockout (KO) mice and *Nrf2* KO mice were bred to create *Cxcr5/Nrf2* double knockout (DKO)  
35 mice. AMD-like features in *Cxcr5/Nrf2* DKO mice were compared with those in *CXCR5* KO mice  
36 and C57BL6 wild-type (WT) controls. The assessment included fundus and optical coherence  
37 tomography (OCT) imaging, periodic acid-Schiff (PAS) and immunofluorescence staining of retinal  
38 pigment epithelium (RPE)–choroid flat mounts and sections. Stained samples were imaged with  
39 fluorescent microscopy, and Western blots were used to monitor protein expression changes. The  
40 staining of cleaved caspase-3, peanut agglutinin (PNA) lectin, and MAP2 was performed to assess the  
41 presence of retinal degeneration and cell apoptosis. Quantification with statistical analysis was  
42 performed with Graphpad software. The 2-, 4-, and 6-month-old DKO mice exhibited increased  
43 hypopigmented spots on fundus and sub-RPE abnormalities on OCT as compared to the *Cxcr5* KO  
44 mice, and C57BL6 WT controls. Aberrant RPE/sub-RPE depositions and increased Bruch's  
45 membrane (BM) thickness were demonstrated by PAS-stained sections. The DKO mice had strong  
46 autofluorescence (A2E) and increased RPE/sub-RPE depositions of IgG and AMD-associated  
47 proteins ( $\beta$  amyloid, Apolipoprotein E, complement 5b-9, and  $\alpha$ B-crystallin). The protein expression  
48 of AMD-associated proteins and Transmembrane Protein 119 (TMEM119) microglia marker were  
49 upregulated at the RPE/BM/choroid complex of DKO mice. The adult DKO mice underwent  
50 accelerated retinal degeneration and cell apoptosis compared to the KO and the WT mice. Together,  
51 the data suggest that the *Cxcr5/Nrf2* DKO mice develop significant AMD-like characteristics at an  
52 early age and may serve as an accelerated AMD model.

## 53 **Introduction**

54 Age-related macular degeneration (AMD) is a complex disease, as exemplified by its association with  
55 various genetic polymorphisms and environmental risk factors and its heterogeneous clinical  
56 manifestations and pathological features, including the early hallmarks of aberrant sub-retinal pigment  
57 epithelium (RPE) and sub-RPE, and sub-retinal deposits such as drusen.(Sarks 1980, Hageman,  
58 Luthert et al. 2001, Anderson, Mullins et al. 2002, Curcio 2018) RPE death and photoreceptor  
59 degeneration are involved in geographic atrophy (GA), or the “dry” form of AMD,(Datta, Cano et al.  
60 2017) whereas sub-retinal invasion of choroidal vessels or choroidal neovascularization (CNV) is a  
61 feature of the “wet” form of AMD.(Bhutto and Lutty 2012) These pathological characteristics are  
62 the consequence of both genetic variant predispositions and environmental risk factors. Among the  
63 cloned and mapped genes that may predispose individuals to AMD are complement factor H  
64 (CFH)(Edwards, Ritter et al. 2005, Haines, Hauser et al. 2005, Klein, Zeiss et al. 2005), apolipoprotein  
65 E (APOE) (Klaver, Kliffen et al. 1998), C-X3-C motif chemokine receptor 1 (CX3CR1),(Tuo, Smith  
66 et al. 2004, Schaumberg, Rose et al. 2014) age-related maculopathy susceptibility 2 (ARMS2), and  
67 HtrA serine peptidase 1 (HTRA1).(Edwards, Chen et al. 2008, Cho, Wang et al. 2009) The known  
68 environmental risk factors for AMD include cigarette smoke, blue light exposure, advanced age, high-  
69 fat diet, and others. Interactions between multiple AMD risk factors may heighten the pathological  
70 processes that damage the photoreceptors and RPE, and thereby resulting in the initiation and  
71 progression of AMD.

72         Reliable and reproducible animal models of AMD are essential for deciphering disease  
73 etiopathogenesis and developing effective therapies. Despite the absence of a macula in the mouse  
74 retina, mice are widely used to create AMD models, primarily because mouse strains can be easily  
75 genetically manipulated and are cost-effective for experimental studies. A number of mouse strains  
76 developed in recent years recapitulate some of the essential characteristics of human AMD, such as

77 RPE pathologies, sub-RPE deposition, and RPE/photoreceptor death, including mice deficient in  
78 antioxidant factor genes, such as superoxide dismutase (SOD1),(Imamura, Noda et al. 2006) in nuclear  
79 factor erythroid 2-related factor 2 (NRF2).(Zhao, Chen et al. 2011) in chemokine receptor, such as C-  
80 C motif chemokine receptor 2 (Ccr2)(Ambati, Anand et al. 2003) and Cx3cr1(Combadiere, Feumi et  
81 al. 2007) genes. Other experimental strains developed for AMD studies include mice immunized with  
82 carboxyethylpyrrole protein (CEP)-adducted protein or antibodies,(Hollyfield, Bonilha et al. 2008,  
83 Hollyfield, Perez et al. 2010) mice with apolipoprotein E (ApoE)(Malek, Johnson et al. 2005)  
84 mutations, and mice that lack RPE-derived soluble vascular endothelial growth factor (VEGF).(Saint-  
85 Geniez, Kurihara et al. 2009)

86         Recently we characterized the eye fundus phenotypes of aged C-X-C motif chemokine  
87 receptor 5 (Cxcr5) knockout mice and found features emblematic of AMD, such as sub-RPE deposits  
88 with drusen appearance and RPE degeneration (which are associated with increased inflammation and  
89 immune dysregulation), increased inflammatory marker cyclo-oxygenase-2, and microglia activation  
90 markers ionized calcium-binding adaptor molecule 1 (Iba1) and arginase 1 (Arg-1), as well as AMD-  
91 associated proteins such as  $\beta$  amyloid, complement 3d (c3d), and  $\alpha$ B-crystallin (all are deposited at  
92 RPE/sub-RPE space and their protein levels were escalated in the RPE/BM/choroid complex protein  
93 extracts of the aged Cxcr5<sup>-/-</sup> mice compared to the same age wild type controls).(Huang, Liu et al.  
94 2017) Moreover, the increased Iba1 and  $\beta$ -amyloid are localized in the sub-retina and in sub-RPE,  
95 indicative of a potential role in promoting abnormal sub-RPE depositions and AMD  
96 pathogenesis.(Lennikov, Saddala et al. 2019)

97         A significant challenge to delineating the etiology and pathophysiology of AMD in animal  
98 models is that AMD-like features generally develop in advanced-age animals, necessitating a  
99 significant amount of lead time for AMD to develop and thus increasing the costs of research. To  
100 circumvent this issue, we sought to develop an accelerated animal model of AMD, in which AMD-



101 like features develop at an early age, by combining the two well-characterized pathological factors of  
102 oxidative stress and inflammation into one mouse strain. We chose the Cxcr5 knockout (KO) mice  
103 and Nrf2 KO mice because they develop increased inflammation and oxidative stress, thus resulting  
104 in the AMD-like features in their respective aged animals.

## 105 **RESULTS**

### 106 **Abnormal Fundus and Sub-RPE Deposits in the adult Cxcr5/Nrf2 double knockout mice**

107 Fundus findings in the 4-month-old Cxcr5/Nrf2 DKO female mice were compared with those  
108 in the age- and gender-matched wild-type (WT) and Cxcr5 KO controls. As expected, the WT animals  
109 demonstrated features of a healthy fundus (Fig. 1A) and the CXCR5 KO mice only had a few  
110 hypopigmented spots (Fig.1B). In contrast, numerous hypopigmented spots were visualized in the  
111 fundus of Cxcr5/Nrf2 DKO mice (Fig.1C). The fundus observations were further confirmed by OCT  
112 imaging, which demonstrated sub-RPE abnormalities that corresponded to hypopigmented areas  
113 observed by fundus imaging (Fig. 1D-F) and the 10 distinct retinal layers from the ganglion cell layer  
114 (GCL) to the choroid of the mid-peripheral retina in both KO and WT controls (Fig. 1G-I).  
115 Quantification indicated that the numbers of hypopigmented spots on the fundus were significantly  
116 higher in the DKO mice than in the KO mice and in the WT controls (Fig. 1J). The sub-RPE  
117 abnormalities on the OCT graphs were also significantly higher in the DKO mice than in the KO mice  
118 and in the WT controls (Fig. 1K).

### 119 **Increased Sub-RPE Deposits and Thickened Bruch's Membrane in the Adult DKO Mice**

120 Periodic acid-Schiff (PAS) staining of retinal sections from the adult DKO mice, the CXCR5  
121 KO mice, and C57BL6 WT controls showed the increased BM and the aberrant deposits within the  
122 RPE and/or sub-RPE deposits in both 2- and 4-month-old DKO animals, but not in the KO mice and  
123 WT controls (Fig. 2A-D). The morphologies of the deposits (punctate and hemisphere) were  
124 consistent in shape and location with the hypopigmented spots and sub-RPE abnormalities visualized

125 by fundus examination and OCT images. Quantifications revealed that the numbers of RPE and sub-  
126 RPE deposits were significantly higher in the DKO mice (both 2 and 4 months old) than in the KO  
127 mice and WT controls (Fig. 2E). BM thickness was also significantly increased in the DKO mice (4  
128 months old) compared to the KO mice and the WT controls (Fig. 2F).

### 129 **Increased Autofluorescence and IgG in the Adult DKO Mice**

130 The retinal sections from C57BL6 WT (2 months), CXCR5/NRF2 DKO (2 and 4 months),  
131 and CXCR5 KO (4 months) mice were examined for autofluorescence with the 488nm wavelength  
132 and endogenous IgG deposits at the interface of the photoreceptor outer segment (POS), RPE, BM,  
133 and choroid. Strong spontaneous fluorescence signals were detected on the POS, RPE, BM, and sub-  
134 RPE of the DKO mice. Autofluorescence signals were detected in the WT mice and the KO mice as  
135 well as DKO mice, but the signal intensity levels were much less in WT and KO mice than in DKO  
136 mice (Figs. 3A-3D), indicative of an increased lipofuscin A2E depositions in the DKO mice. IgG  
137 levels were increased at the RPE-BM-choroid interface and at the ganglion cell layers of the DKO  
138 mice as compared to those of the KO mice and the WT controls (Figs. 3E-H). Western blotting results  
139 (without the addition of primary antibody) further confirmed that the endogenous IgG levels were  
140 increased in both RPE/BM/choroid and retinal protein extracts (Fig. 3I).

### 141 **Increased AMD-Associated Protein Depositions in the Adult DKO Mice**

142 Immunofluorescence (IF) staining to examine the RPE/sub-RPE deposition of the four  
143 AMD/drusen-associated proteins— $\beta$ -amyloid ( $A\beta$ ),  $\alpha$ B-crystallin, apolipoprotein-E (Apo-E), and  
144 complement (C5b-9)—revealed that immune reactivity of  $A\beta$  and  $\alpha$ B-crystallin at the RPE and the  
145 sub-RPE space was increased in the 4- and 6-month-old DKO mice but was not detected in the KO  
146 mice and the WT controls and was only barely detected in the 2-month-old DKO mice (Fig. 4). In a  
147 similar manner, the RPE/sub-RPE depositions of Apo-E and C5b-9 were markedly elevated in the  
148 DKO mice compared to the KO mice and the WT control (Fig. 5).

## 149 **Elevated AMD-Associated Proteins and Reduced RPE Zonula Occludens-1 Protein Levels in** 150 **Adult DKO Mice**

151 As RPE and sub-RPE depositions of AMD-association proteins could cause RPE degeneration,  
152 we, therefore, examined whether the zonula occludens-1 (ZO-1) protein was degraded in the RPE of  
153 DKO mice. As indicated by the decreased immune staining signal intensity, ZO-1 was markedly  
154 reduced on the RPE flat mounts of the DKO mice compared to the KO mice and the WT controls (Fig.  
155 6). It was also noted that the normal hexagonal shapes of RPE were compromised in the DKO mice  
156 (Fig. B), but both the KO mice and the WT controls had a regular layout of ZO-1(+) RPE cells.  
157 Western blot results further confirmed that ZO-1 protein levels were reduced in the adult DKO mice  
158 (4 and 6 months old) compared to the KO mice and the WT controls (Fig. 6D). Western blot results  
159 further revealed that the protein levels of A $\beta$ , Apo-E, C5b-9, and IgG heavy chain (HC) and light  
160 chain (LC) were upregulated in the 4-month-old DKO mice and further increased in the 6-month-old  
161 DKO mice as compared with the levels in KO mice and the WT controls. Interestingly, the microglia  
162 maker TMEM119 was also upregulated in the adults of DKO mice, as compared to the KO and the  
163 WT controls.

## 164 **Accelerated Retinal Degeneration and Apoptotic Cell Death in Adult DKO Mice**

165 Finally, we investigated whether retinal degeneration and apoptotic cell death are present in  
166 the adult DKO mice. The retinal flat mounts from the 6-month-old DKO mice and the age-matched  
167 WT and KO mice were stained with peanut agglutinin lectin, cleaved caspase 3, and microtubule-  
168 associated protein 2 (MAP2). Both PNA lectin (+) photoreceptors and MAP2 (+) retinal neurons were  
169 significantly decreased in the DKO mice compared with the levels in KO and WT mice (Figs. 7A,7B).  
170 Concomitantly, the cleaved caspase 3 (+) cells on the ganglion cell layer and photoreceptor cell layer  
171 were markedly increased in the DKO mice compared to the apoptotic cell numbers in retinal  
172 specimens from KO mice and WT controls (Figs. 7C, 7D). Further quantification revealed that the

173 photoreceptors and ganglion cell densities were significantly lower in the DKO mice than in the KO  
174 mice and the WT controls (Figs. 7E,7F), but the numbers of cleaved caspase 3 (+) apoptotic cells were  
175 significantly higher in the DKO mice than in the KO and WT mice. Interestingly slight, but significant  
176 increase of caspase 3 (+) was also observed in ganglion and photoreceptor cell layer of adult KO mice  
177 (Figs. 7G, 7H).

## 178 **DISCUSSION**

179 Recently we described retinal degenerative phenotypes in aged  $Cxc5^{-/-}$  mice in association with loss  
180 of blood-retinal barrier function, the accumulation of AMD-associated proteins such as  $\beta$ - amyloid,  
181 Apolipoprotein-E, complement (C3d and C5b-9), and  $\alpha$ B-crystallin, and the occurrence of specific  
182 autoimmune responses as possible driving forces of retinal degeneration. However, while many of the  
183 AMD features are recapitulated in the aged  $Cxc5^{-/-}$  mice, after 12 months of life the  $Cxc5^{-/-}$  mice start  
184 to develop retinal degeneration, which becomes prominent by 18-24 months of age, making it difficult  
185 to utilize this animal in studies of potential therapeutic interventions for AMD. Therefore, we tried to  
186 create an accelerated animal model of AMD, in which AMD-like phenotypes develop at an early age.

187 The original conception was that the combination of the two distinct pathological factors  
188 (oxidative stress and inflammation/immune deregulation) could accelerate the onset and progression  
189 of the AMD pathologies. Initially, we attempted to combine  $Cxcr5^{-/-}$  mice with  $Sod1^{mut/mut}$  mutant  
190 mice (B6SJL-Tg (SOD1\*G93A) 1Gur/J; Jackson Laboratory, Bar Harbor, ME, USA), which contain  
191 mutant human SOD1 gene (harboring a single amino acid substitution of glycine to alanine at codon  
192 93) driven by its endogenous human SOD1 promoter. While fundus and histological observations  
193 revealed that  $Cxcr5^{-/-}.Sod1^{mut/mut}$  mutant mice did develop some accelerated AMD-like features as  
194 early as one month of age (data not shown), their short life span, poor health, low fertility, and small  
195 litter size made it challenging to maintain this line, thus reducing the ability to perform complete  
196 phenotypic analysis and the potential usefulness of this mouse strain as an AMD model. In addition,

197 as SOD1 mutations are a known factor in amyotrophic lateral sclerosis but are not directly implicated  
198 in human AMD, we changed our attention to Nrf2 (the robustly established oxidative stress gene).  
199 Nrf2<sup>-/-</sup> mice are known to be fertile and reasonably healthy.(Zhao, Chen et al. 2011) It is well  
200 documented in the literature that Nrf2 is a protective transcription factor controlling the gene  
201 expression of a wide range of antioxidants.(Bellezza 2018) Nrf2<sup>-/-</sup> mice demonstrate typical AMD-  
202 like characteristics at 12 months and older due to increased oxidative damage.(Zhao, Chen et al. 2011)  
203 Furthermore, the role of Nrf2 has recently been implicated in human AMD and prospected as the  
204 therapeutic target.(Bellezza 2018)

205         The Cxcr5<sup>-/-</sup>.Nrf2<sup>-/-</sup> mice are viable, healthy, and fertile. With AMD-like features such as BM  
206 thickness, aberrant RPE/sub-RPE depositions, increased auto-fluorescence and IgG, elevated  
207 complement activation, and retinal cell apoptosis and degeneration occurring at early ages (versus the  
208 older ages of single KO of each founding mouse lines), this DKO mouse line could be thought of as  
209 an accelerated model for AMD and could be beneficial for studying disease etiology and assessing  
210 potential pharmacotherapeutic agents. The AMD-like features detected in the aged Cxcr5 KO, aged  
211 Nrf2 KO, and adult DKO mice are summarized in **Table 1**. It is worth noting that we carefully bred  
212 out the RD8 mutation from both founder breeding lines and examined the genotyping for the *Crb1*  
213 gene by Sanger sequencing and subsequently through custom RT-PCR probe, with the assistance of  
214 TransnetYX company. While animals on C57BL/6j background usually do not have *rd8* mutation of  
215 the *Crb1* gene, it is a common occurrence in animals on C57BL/6N background such as Nrf2<sup>-/-</sup> mice.  
216 The *crb1-rd8* mutation is an emerging problem of retinal degeneration research in mice and was  
217 recently addressed by Mattapallil et al. (Mattapallil, Wawrousek et al. 2012)

218         It is certain that increased oxidative stress is a contributing factor to the accelerated process of  
219 AMD pathology in the Cxcr5/Nrf2 DKO mice. However, the mechanism through which Cxcr5  
220 deficiency contributes to the development of sub-RPE deposits and AMD pathologies remains to be

221 clarified. Several potential mechanisms may be involved. Immune deregulation caused by Cxcr5  
222 deficiency may lead to specific autoimmune inflammation in the RPE and the retina, causing RPE  
223 defects and AMD development. Our previous studies demonstrated substantial sub-RPE accumulation  
224 of IgG, (Huang, Liu et al. 2017) which was later identified as autoantibodies to the AMD-associated  
225 proteins, such as annexin-A2,  $\alpha$ B-crystallin, ubiquitin-B, and aquaporin-5.(Lennikov, Saddala et al.  
226 2019) Cxcr5 may also be important for the stabilization of microglial cells and the regulation of their  
227 response to microenvironment changes. When Cxcr5 was blocked by antibodies in BV-2 cells,  
228 microglia showed more activation in response to proinflammatory stimulation.(Lennikov, Saddala et  
229 al. 2019) Furthermore, Cxcr5 may play a role in the maintenance of RPE homeostasis and polarization  
230 states, particularly in stress conditions such as aging, and oxidative and pro-inflammatory insults.  
231 Whether and how these mechanisms interplay to exacerbate the AMD pathological process in  
232 Cxcr5/Nrf2 DKO mice remains to be determined.

233         Among the perturbed biological pathways and processes in AMD are complement pathways,  
234 cytokines, chemokines, phagocytosis, autophagy, lipid metabolism, and oxidative stress, many of  
235 which have been investigated to generate animal models of AMD that mimic the AMD features  
236 observed in humans. Although mice are popularly used as an AMD model, AMD-like pathologies  
237 often develop at the advanced age,(Rakoczy, Zhang et al. 2002, Ambati, Anand et al. 2003) and in  
238 some cases require additional stimuli, such as feeding with the high-fat diet, exposure to cigarette  
239 smoke, blue light,(Cousins, Espinosa-Heidmann et al. 2002) or injection by lipid oxidants.(Hollyfield,  
240 Bonilha et al. 2008, Baba, Bhutto et al. 2010) To overcome this issue, we sought to generate an  
241 accelerated mouse model of AMD by crossing Cxcr5 KO mice and Nrf2 KO mice and found that  
242 these DKO mice develop the AMD phenotypic features at earlier ages (2 to 6 months) than those aged  
243 models (9 months and older). These new DKO mice may provide to be suitable for the elucidation of

244 the underlying mechanisms of AMD pathology and the evaluation of new treatment strategies and  
245 drug candidates for AMD.

246

## 247 **MATERIALS AND METHODS**

### 248 **Animals, Genotyping and Breeding Strategy**

249 All experiments were approved by the University of Missouri Institutional Animal Care and Use  
250 Committee (protocol number: 9520) and performed in accordance with the “Statement for the Use of  
251 Animals in Ophthalmic and Vision Research” of the Association for Research in Vision and  
252 Ophthalmology. The [B6.129S2(Cg)-Cxcr5tm1<sup>Lipp/J</sup>] (CXCR5, KO), B6.129X1-Nfe2l2<sup>tm1Ywk/J</sup>  
253 (NRF2) and [C57BL/6J] (WT) mice strains were purchased from Jackson Laboratory. CXCR5 mice  
254 (<https://www.jax.org/strain/006659>) and NRF2 mice (<https://www.jax.org/strain/017009>) are on a  
255 mixed C57/BL6J/N background with the predominance of C57/BL6J genome. All mice were housed  
256 at the special pathogen-free animal facilities of the Bone Life Sciences Center at the University of  
257 Missouri and were fed normal chow diets and provided with water *ad libitum*.

258 The two founder mice were bred to generate the Cxcr5/Nrf2 double knockout (DKO) mice.  
259 The RD8 mutation in the Crb1 gene incorporated in the Nrf2<sup>-/-</sup> founder animal was bred out to achieve  
260 the stable Cxcr5/Nrf2 (DKO) mouse line with wild-type RD8 genotype (Cxcr5<sup>-/-</sup>.Nrf2<sup>-/-</sup>.Crb1-  
261 Rd8<sup>wt/wt</sup>). The description of the breeding program is presented in Suppl. Fig.1. The Cxcr5/Nrf2 DKO  
262 mice were maintained and inbred-crossed to give birth to more progenies for further research.

263 Genotyping was performed with the assistance of Transnetyx (Cordova, TN, USA),  
264 Outsourced PCR Genotyping Services ([www.transnetyx.com](http://www.transnetyx.com)) by real-time polymerase chain reaction  
265 (PCR) genotypic assay. Genomic DNA (50 ng) was extracted from tail tips and amplified using  
266 custom-designed genotyping primers (TransnetYX). Animals were validated for knockout of the  
267 CXCR5, NRF2 gene, the presence of the neomycin resistance, and LacZ genes. All mice were  
268 screened for the presence of Rd8-associated nucleotide deletion, using the Rd8 genotyping probe



269 designed by Transnetyx, based on our previous Sanger sequencing data of the region 3600-3700 of  
270 the *Crb1* gene (canonical transcript M\_133239). (Lennikov, Saddala et al. 2019)

### 271 **Anesthesia and Euthanasia**

272 During *in vivo* experiments, mice were anesthetized by intraperitoneal injection of ketamine  
273 hydrochloride (100 mg/kg body weight) and xylazine (4 mg/kg body weight) at the experimental  
274 endpoints of 2, 4 and 6 months of age. For tissue collection, mice were euthanized by intraperitoneal  
275 injection of ketamine hydrochloride (300 mg/kg body weight).

### 276 **Fundus Examination and Optical Coherency Tomography**

277 Mice were anesthetized. Pupils were dilated with 1% tropicamide (Sandoz, US). The cornea was  
278 protected with (hypromellose ophthalmic demulcent solution) Gonak 2.5% (Akorn LLC, Akorn, OH,  
279 USA) transparent gonioscopy gel. Fundus examination and optical coherence tomography (OCT) was  
280 performed with a Micron IV retinal imaging microscope system (Phoenix Research Labs, Inc.,  
281 Pleasanton, CA, USA). Grayscale OCT images were further processed to produce the heatmap images,  
282 where grayscale range 0 (black) to 255 (white) colors were assigned using Photoshop CC gradient  
283 map function (Adobe, San Jose, CA, USA). Fundus hypopigmented spots and OCT abnormalities  
284 were quantified by “masked” observer.

### 285 **Confocal Microscope Imaging**

286 Visible light images were acquired using the EVOS FL Color microscope (Thermo Fisher Scientific,  
287 Waltham, MA, USA). Fluorescent images were acquired with a LeicaSP8 laser confocal microscope  
288 (Leica AG, Wetzlar, Germany).

### 289 **Histology and Immunofluorescent Analysis**

290 The eyeballs were fixed with HistoChoice Molecular Biology fixative (H120-4L, VWR Life Science,  
291 Radnor, PA, USA) for 12 hours and stored in phosphate-buffered saline (PBS; 10010023, Thermo  
292 Fisher Scientific) until specimens were processed for paraffin embedding and sectioning (5  $\mu$ m thick)



293 and stained by periodic acid and Schiff reagents staining, as reported previously.(Lennikov, Saddala  
294 et al. 2019) Sections intended for autofluorescence evaluation were deparaffinized, rehydrated and  
295 mounted without staining. Sections for the detection of autoantibodies accumulation were blocked  
296 and permeabilized with 0.5% Triton X-100 (85111, Thermo Fisher Scientific) and blocked with 2.5%  
297 bovine serum albumin solution (BSA; A7906-50G, Sigma-Aldrich, St. Louis, MO, USA) for 1 hour  
298 at room temperature and incubated overnight at 4°C with antimouse (ab6563) secondary antibody.

299 The primary antibody used for immunofluorescent analysis in rehydrated sections included:  
300 beta-amyloid (36-6900; 1:100, Thermo Fisher Scientific);  $\alpha$ B-crystallin (Ab151722, 1:50; Abcam,  
301 Cambridge, England); ApoE (AB947, 1:50; MilliporeSigma, Burlington, MA, USA); Complement  
302 5b-9 (204903-1MG, 1:50; EMD Millipore Corp). Following PBS-Tween 20 0.05% (PBS-T) washing.  
303 The immune reactive signals were visualized by Cy5 conjugated anti-rabbit (ab97077, Abcam), anti-  
304 mouse (ab6563, Abcam) and anti-goat (ab150131, Abcam) secondary antibody 1:1,000 (Abcam).  
305 Sections were counterstained with 4', 6-diamidino-2-phenylindole (DAPI) 1:5,000 (Sigma-Aldrich)  
306 and mounted with ProLong Diamond antifade reagent (P36961, Thermo Fisher Scientific).

### 307 **Retinal and RPE–Choroid-Sclera Complex Flat Mounts**

308 Mouse retinas were fixed and isolated as reported previously. (Lennikov, Saddala et al. 2019) Briefly,  
309 under a dissection microscope, the anterior segment tissues, vitreous, and were removed to produce  
310 an eyecup. Then retina was gently separated from RPE–choroid sclera complex (RCSC), and four  
311 relaxing radial incisions were made to RCSC and retina in order to produce the flat-mount. The retinas  
312 and RCSC was blocked and permeabilized with a solution composed of 2.5% bovine serum albumin  
313 (BSA; 00000) in PBS overnight with 0.01% Triton-X; RCSC samples were then incubated with beta-  
314 amyloid (36-6900; 1:100; Thermo Fisher Scientific),  $\alpha$ B-crystallin (Ab151722, 1:50; Abcam), ApoE  
315 (AB947, 1:50; MilliporeSigma); Complement 5b-9 (204903-1MG, 1:50; EMD Millipore Corp); and  
316 anti-ZO-1 (1:100, 402200, Thermo Fisher Scientific,). Retina samples were incubated for 24 hours at

317 4°C with gentle agitation, in peanut agglutinin (PNA) lectin (1:50, L32460; Thermo Fisher Scientific),  
318 MAP2 (1:100, 13-1500; Thermo Fisher Scientific), and cleaved-caspase 3 (1:50, D175, 5A1E; Cell  
319 Signaling Technology, Danvers, MA, USA); before being washed three times for 10 min with PBS-  
320 T; PNA lectin-stained retinas were counterstained with 4', 6-diamidino-2-phenylindole (DAPI)  
321 1:5,000 (Sigma-Aldrich) and mounted with ProLong Diamond antifade reagent (Thermo Fisher  
322 Scientific). Remaining samples were incubated for 24 hours with Cy5-conjugated anti-rabbit  
323 (ab97077), anti-mouse (ab6563) and anti-goat (ab150131) secondary antibody (1:1,000; Abcam) and  
324 counterstained with DAPI 1:5,000 (Sigma-Aldrich). After another PBS-T washing three times for 10  
325 min, the samples were mounted on slides with ProLong Diamond antifade reagent. Samples incubated  
326 with a blocking buffer (primary antibody was omitted), followed by secondary antibody incubation  
327 were used as the background control.

### 328 **Western Blot Analysis**

329 Retinal and RCSC were isolated on ice, and lysates were prepared as previously described. (Lennikov,  
330 Saddala et al. 2019) Thirty micrograms of total proteins were separated by SDS-PAGE gel (Mini-  
331 Protean Precast Acrylamide Gels, Bio-Rad, Hercules, CA, USA) and further transferred to the  
332 nitrocellulose membrane (Trans-Blot Turbo transfer pack, Bio-Rad). Membranes were blocked with  
333 2.5% BSA and incubated with primary antibodies: beta-amyloid (36-6900; 1:100, Thermo Fisher  
334 Scientific); anti-ZO-1 (1:1000, 402200, Thermo Fisher Scientific), anti-C5b-9 (204903, 1: 1000, EMD  
335 Millipore Corp); anti-ApoE (AB947, 1:1000, EMD Millipore Corp); Transmembrane Protein 119  
336 (TMEM119) (1:1000, ab209064, Abcam) or  $\beta$ -actin (PA1-21167; 1:2,000; Thermo Fisher Scientific).

337 The target protein bands were detected with a horseradish peroxidase (HRP)-conjugated  
338 antibody (170-6515, 172-1011, 1720-1011, 1:1,000; Bio-Rad), which was visualized by  
339 chemiluminescence with Clarity Western ECL substrate (Bio-Rad) and imaged using the LAS-500  
340 Imaging System (General Electric, Boston, MA, USA). The resulting band sizes were resolved using

341 Precision Plus Protein™ Kaleidoscope™ Prestained Protein Standard (1610375, Bio-Rad). For  
342 autoantibody detection, the Western blot on RCSC and retinal lysates were separated as described  
343 above. Following blocking, membranes were incubated with Goat Anti-Mouse IgG (Heavy + Light)-  
344 HRP conjugate (170-6516, 1:1,000; Bio-Rad) overnight and following PBS-T washing detected using  
345 the LAS-500 Imaging System (General Electric).

346

### 347 **Statistical Analysis**

348 All experiments were performed in triplicates. Experimental values were expressed as the mean ±  
349 standard deviation (SD) for the respective groups. Statistical analyses were performed with GraphPad  
350 Prism software (<https://www.graphpad.com/scientific-software/prism/>). A one-way ANOVA with  
351 Tukey multiple comparisons was used. A p-value of less than 0.05 was considered significant. The  
352 following designations for the *P*-value were as follows: n.s. *P* >0.05; \* *P* <0.05; \*\* *P* <0.01; \*\*\* *P*  
353 <0.001.

354

### 355 **References**

- 356 Ambati, J., A. Anand, S. Fernandez, E. Sakurai, B. C. Lynn, W. A. Kuziel, B. J. Rollins and B. K. Ambati (2003).  
357 "An animal model of age-related macular degeneration in senescent Ccl-2- or Ccr-2-deficient mice." Nat  
358 Med **9**(11): 1390-1397.
- 359 Anderson, D. H., R. F. Mullins, G. S. Hageman and L. V. Johnson (2002). "A role for local inflammation in the  
360 formation of drusen in the aging eye." Am J Ophthalmol **134**(3): 411-431.
- 361 Baba, T., I. A. Bhutto, C. Merges, R. Grebe, D. Emmert, D. S. McLeod, D. Armstrong and G. A. Luty (2010). "A  
362 rat model for choroidal neovascularization using subretinal lipid hydroperoxide injection." Am J Pathol  
363 **176**(6): 3085-3097.
- 364 Bellezza, I. (2018). "Oxidative Stress in Age-Related Macular Degeneration: Nrf2 as Therapeutic Target." Front Pharmacol **9**: 1280.
- 365  
366 Bhutto, I. and G. Luty (2012). "Understanding age-related macular degeneration (AMD): relationships  
367 between the photoreceptor/retinal pigment epithelium/Bruch's membrane/choriocapillaris complex." Mol  
368 Aspects Med **33**(4): 295-317.
- 369 Cho, Y., J. J. Wang, E. Y. Chew, F. L. Ferris, 3rd, P. Mitchell, C. C. Chan and J. Tuo (2009). "Toll-like receptor  
370 polymorphisms and age-related macular degeneration: replication in three case-control samples." Invest  
371 Ophthalmol Vis Sci **50**(12): 5614-5618.
- 372 Combadiere, C., C. Feumi, W. Raoul, N. Keller, M. Rodero, A. Pezard, S. Lavalette, M. Houssier, L. Jonet, E.  
373 Picard, P. Debre, M. Sirinyan, P. Deterre, T. Ferroukhi, S. Y. Cohen, D. Chauvaud, J. C. Jeanny, S. Chemtob, F.

374 Behar-Cohen and F. Sennlaub (2007). "CX3CR1-dependent subretinal microglia cell accumulation is  
375 associated with cardinal features of age-related macular degeneration." *J Clin Invest* **117**(10): 2920-2928.

376 Cousins, S. W., D. G. Espinosa-Heidmann, A. Alexandridou, J. Sall, S. Dubovy and K. Csaky (2002). "The role of  
377 aging, high fat diet and blue light exposure in an experimental mouse model for basal laminar deposit  
378 formation." *Exp Eye Res* **75**(5): 543-553.

379 Curcio, C. A. (2018). "Soft Drusen in Age-Related Macular Degeneration: Biology and Targeting Via the Oil  
380 Spill Strategies." *Invest Ophthalmol Vis Sci* **59**(4): AMD160-AMD181.

381 Datta, S., M. Cano, K. Ebrahimi, L. Wang and J. T. Handa (2017). "The impact of oxidative stress and  
382 inflammation on RPE degeneration in non-neovascular AMD." *Prog Retin Eye Res* **60**: 201-218.

383 Edwards, A. O., D. Chen, B. L. Fridley, K. M. James, Y. Wu, G. Abecasis, A. Swaroop, M. Othman, K. Branham,  
384 S. K. Iyengar, T. A. Sivakumaran, R. Klein, B. E. Klein and N. Tosakulwong (2008). "Toll-like receptor  
385 polymorphisms and age-related macular degeneration." *Invest Ophthalmol Vis Sci* **49**(4): 1652-1659.

386 Edwards, A. O., R. Ritter, 3rd, K. J. Abel, A. Manning, C. Panhuysen and L. A. Farrer (2005). "Complement  
387 factor H polymorphism and age-related macular degeneration." *Science* **308**(5720): 421-424.

388 Hageman, G. S., P. J. Luthert, N. H. Victor Chong, L. V. Johnson, D. H. Anderson and R. F. Mullins (2001). "An  
389 integrated hypothesis that considers drusen as biomarkers of immune-mediated processes at the RPE-  
390 Bruch's membrane interface in aging and age-related macular degeneration." *Prog Retin Eye Res* **20**(6): 705-  
391 732.

392 Haines, J. L., M. A. Hauser, S. Schmidt, W. K. Scott, L. M. Olson, P. Gallins, K. L. Spencer, S. Y. Kwan, M.  
393 Nouredine, J. R. Gilbert, N. Schnetz-Boutaud, A. Agarwal, E. A. Postel and M. A. Pericak-Vance (2005).  
394 "Complement factor H variant increases the risk of age-related macular degeneration." *Science* **308**(5720):  
395 419-421.

396 Hollyfield, J. G., V. L. Bonilha, M. E. Rayborn, X. Yang, K. G. Shadrach, L. Lu, R. L. Ufret, R. G. Salomon and V.  
397 L. Perez (2008). "Oxidative damage-induced inflammation initiates age-related macular degeneration." *Nat*  
398 *Med* **14**(2): 194-198.

399 Hollyfield, J. G., V. L. Perez and R. G. Salomon (2010). "A hapten generated from an oxidation fragment of  
400 docosahexaenoic acid is sufficient to initiate age-related macular degeneration." *Mol Neurobiol* **41**(2-3):  
401 290-298.

402 Huang, H., Y. Liu, L. Wang and W. Li (2017). "Age-related macular degeneration phenotypes are associated  
403 with increased tumor necrosis-alpha and subretinal immune cells in aged Cxcr5 knockout mice." *PLoS One*  
404 **12**(3): e0173716.

405 Imamura, Y., S. Noda, K. Hashizume, K. Shinoda, M. Yamaguchi, S. Uchiyama, T. Shimizu, Y. Mizushima, T.  
406 Shirasawa and K. Tsubota (2006). "Drusen, choroidal neovascularization, and retinal pigment epithelium  
407 dysfunction in SOD1-deficient mice: a model of age-related macular degeneration." *Proc Natl Acad Sci U S A*  
408 **103**(30): 11282-11287.

409 Klaver, C. C., M. Kliffen, C. M. van Duijn, A. Hofman, M. Cruts, D. E. Grobbee, C. van Broeckhoven and P. T.  
410 de Jong (1998). "Genetic association of apolipoprotein E with age-related macular degeneration." *Am J Hum*  
411 *Genet* **63**(1): 200-206.

412 Klein, R. J., C. Zeiss, E. Y. Chew, J. Y. Tsai, R. S. Sackler, C. Haynes, A. K. Henning, J. P. SanGiovanni, S. M.  
413 Mane, S. T. Mayne, M. B. Bracken, F. L. Ferris, J. Ott, C. Barnstable and J. Hoh (2005). "Complement factor H  
414 polymorphism in age-related macular degeneration." *Science* **308**(5720): 385-389.

415 Lennikov, A., M. S. Saddala, A. Mukwaya, S. Tang and H. Huang (2019). "Autoimmune-Mediated Retinopathy  
416 in CXCR5-Deficient Mice as the Result of Age-Related Macular Degeneration Associated Proteins  
417 Accumulation." *Front Immunol* **10**: 1903.

418 Malek, G., L. V. Johnson, B. E. Mace, P. Saloupis, D. E. Schmechel, D. W. Rickman, C. A. Toth, P. M. Sullivan  
419 and C. Bowes Rickman (2005). "Apolipoprotein E allele-dependent pathogenesis: a model for age-related  
420 retinal degeneration." *Proc Natl Acad Sci U S A* **102**(33): 11900-11905.

421 Mattapallil, M. J., E. F. Wawrousek, C. C. Chan, H. Zhao, J. Roychoudhury, T. A. Ferguson and R. R. Caspi  
422 (2012). "The Rd8 mutation of the Crb1 gene is present in vendor lines of C57BL/6N mice and embryonic  
423 stem cells, and confounds ocular induced mutant phenotypes." *Invest Ophthalmol Vis Sci* **53**(6): 2921-2927.

424 Rakoczy, P. E., D. Zhang, T. Robertson, N. L. Barnett, J. Papadimitriou, I. J. Constable and C. M. Lai (2002).  
425 "Progressive age-related changes similar to age-related macular degeneration in a transgenic mouse  
426 model." Am J Pathol **161**(4): 1515-1524.  
427 Rojo, A. I., N. G. Innamorato, A. M. Martin-Moreno, M. L. De Ceballos, M. Yamamoto and A. Cuadrado  
428 (2010). "Nrf2 regulates microglial dynamics and neuroinflammation in experimental Parkinson's disease."  
429 Glia **58**(5): 588-598.  
430 Saint-Geniez, M., T. Kurihara, E. Sekiyama, A. E. Maldonado and P. A. D'Amore (2009). "An essential role for  
431 RPE-derived soluble VEGF in the maintenance of the choriocapillaris." Proc Natl Acad Sci U S A **106**(44):  
432 18751-18756.  
433 Sarks, S. H. (1980). "Council Lecture. Drusen and their relationship to senile macular degeneration." Aust J  
434 Ophthalmol **8**(2): 117-130.  
435 Schaumberg, D. A., L. Rose, M. M. DeAngelis, R. D. Semba, G. S. Hageman and D. I. Chasman (2014).  
436 "Prospective study of common variants in CX3CR1 and risk of macular degeneration: pooled analysis from 5  
437 long-term studies." JAMA Ophthalmol **132**(1): 84-95.  
438 Tuo, J., B. C. Smith, C. M. Bojanowski, A. D. Meleth, I. Gery, K. G. Csaky, E. Y. Chew and C. C. Chan (2004).  
439 "The involvement of sequence variation and expression of CX3CR1 in the pathogenesis of age-related  
440 macular degeneration." FASEB J **18**(11): 1297-1299.  
441 Zhao, Z., Y. Chen, J. Wang, P. Sternberg, M. L. Freeman, H. E. Grossniklaus and J. Cai (2011). "Age-related  
442 retinopathy in NRF2-deficient mice." PLoS One **6**(4): e19456.

443

444

445 **Table 1: AMD phenotypic feature in aged Cxcr5 KO, aged Nrf2 KO, and DKO**

|                                        | <b>Aged Cxcr5<sup>-/-</sup> (Huang, Liu et al. 2017, Lennikov, Saddala et al. 2019)</b> | <b>Aged Nrf2<sup>-/-</sup> (Zhao, Chen et al. 2011)</b>                 | <b>Adult Cxcr5<sup>-/-</sup>.Nrf2<sup>-/-</sup></b> |
|----------------------------------------|-----------------------------------------------------------------------------------------|-------------------------------------------------------------------------|-----------------------------------------------------|
| <b>Complement pathway</b>              | C3d                                                                                     | C3d                                                                     | C5a-q                                               |
| <b>Inflammation</b>                    | TNFα, COX-2<br>( <i>in vivo, in vitro</i> )                                             | IL-6, TNF-α, IL-β<br>( <i>in vitro</i> ) (Rojo, Innamorato et al. 2010) | Unknown                                             |
| <b>Oxidative damage</b>                | No                                                                                      | Yes                                                                     | Unknown                                             |
| <b>Retinal neuron death</b>            | Reduced Map2, Lectin (+)<br>photoreceptor loss                                          |                                                                         | Unknown                                             |
| <b>Decreased ERG</b>                   | Yes                                                                                     | Yes                                                                     | Unknown                                             |
| <b>Sub-RPE deposits/Drusen</b>         | Yes                                                                                     | Yes                                                                     | Yes                                                 |
| <b>Hypopigmented spots</b>             | Yes                                                                                     | Yes                                                                     | Yes                                                 |
| <b>Increased BM thickness</b>          | Yes                                                                                     | Yes                                                                     | Yes                                                 |
| <b>RPE atrophy</b>                     | RPE degeneration,                                                                       | Yes                                                                     | Yes                                                 |
| <b>Compromised BRB</b>                 | Yes                                                                                     | Unknown                                                                 | Yes                                                 |
| <b>Amyloid accumulation</b>            | Yes (β-Amyloid)                                                                         | Yes (SAP)                                                               | Yes (β-Amyloid)                                     |
| <b>AlphaB-crystallin</b>               | Yes                                                                                     | Unknown                                                                 | Yes                                                 |
| <b>Lipid metabolism</b>                | Lipid oil droplet                                                                       | Lipofuscin<br>accumulation                                              | APOE                                                |
| <b>Immune dysregulation</b>            | CD4(+) T cells, Increased<br>Igg                                                        | Increased Igg                                                           | Increased Igg                                       |
| <b>Increased autofluorescence</b>      | Yes                                                                                     | Yes                                                                     | Yes                                                 |
| <b>choroidal neovascularization</b>    | Yes                                                                                     | Yes                                                                     | Yes                                                 |
| <b>Autophagy/lysosomal degradation</b> | Unknown                                                                                 | Yes                                                                     | Unknown                                             |
| <b>RPE Vacuole</b>                     | Yes                                                                                     | Yes                                                                     | Unknown                                             |
| <b>CRB1-RD8 mutant</b>                 | No                                                                                      | No                                                                      | No                                                  |

446 *BM – Bruch’s membrane; BRB – blood-retinal barrier; ERG – electroretinography; SAP - Serum amyloid P*  
 447 *component; RPE – retinal pigment epithelia*

448

#### 449 **Figure legends**

450 **Figure 1.** Fundus and OCT images in 4-month-old C57BL/6 WT, CXCR5 KO, and CXCR5/NRF2  
 451 DKO mice. The representative fundus images C57BL/6 WT (A), CXCR5 KO (B); CXCR5/NRF2  
 452 DKO (C), white bars in the fundus images indicate the area of the corresponding OCT scan. The  
 453 enlarged portion of the fundus image corresponding to the OCT scan area and contrast-enhanced

454 monochrome version of the same image demonstrate hypopigmented spots (D-F). The representative  
455 OCT images (top) and the corresponding OCT heatmaps (bottom) (G-I). White dotted lines map the  
456 fundus features in the enlarged high-contrast portions of the fundus images to the abnormal sub-RPE  
457 deposits. The quantification of hypopigmented spots in the fundus images (J). The quantification of  
458 sub-RPE abnormalities in the OCT data (K). The spots numbers on fundus images and the sub-RPE  
459 abnormalities were counted by “masked” observer and averaged from images acquired from 4 animals  
460 per group ( $n = 4$ ). Retinal layers were denoted as follows. GCL: ganglion cell layer. IPL: inner  
461 plexiform layer. INL: inner nuclear layer. OPL: outer plexiform layer. ONL: outer nuclear layer. PIS:  
462 photoreceptor inner segment. POS: photoreceptor outer segment. RPE: retinal pigment epithelium.  
463 BM: Bruch’s membrane. CHO: choroid. Hypopigmented spots and sub-RPE abnormalites were  
464 averaged from 4 fundus and OCT images, respectively ( $n = 4$ ).  $P$  values were denoted: n.s.  $P > 0.05$ ;  
465  $*P < 0.05$ ;  $**P < 0.01$ ;  $***P < 0.001$ .

466 **Figure 2.** Increased RPE/sub-RPE deposits and thickened Bruch’s membrane (BM) in the adult  
467 CXCR5<sup>-/-</sup>.NRF2<sup>-/-</sup> mice, as demonstrated by PAS staining. Four-month-old C57BL/6 WT mice (A),  
468 2- and 4-month-old CXCR5/NRF2 DKO (B-C), and 4-month-old CXCR5 KO (D) mice histological  
469 sections were studied, revealing presence of PAS (+) deposits in RPE-layer of DKO mice at 2-months  
470 of age (B); PAS (+) deposits are increasing in size pushing against the thickening Bruchs membrane  
471 (visible as pink layer) into choroid layer in 4-months old DKO mice (C). Retinal layers were denoted  
472 as follows: ONL, outer nuclear layer; PIS, photoreceptor inner segment; POS, photoreceptor outer  
473 segment. RPE, retinal pigment epithelium; BM, Bruch’s membrane; and CHO, choroid. (E)  
474 Quantification of PAS (+) deposits within RPE and sub-RPE area. The numbers of RPE/sub-RPE  
475 deposits were counted and averaged per group ( $n = 4$ ). Quantification of the BM thickness (F). The  
476 values were averaged from 4 samples per group ( $n = 4$ ).  $P$  values were denoted: n.s.  $P > 0.05$ ;  $***P$   
477  $< 0.001$ .

478 **Figure 3.** Increased autofluorescence and IgG depositions at RPE and sub-RPE space of the adult  
479 CXCR5<sup>-/-</sup>.NRF2<sup>-/-</sup> mice. Autofluorescence at 488 nm wavelength was examined in the retinal sections  
480 prepared from C57B6/J wild type (A, WT, 4 months), CXCR5<sup>-/-</sup>.NRF2<sup>-/-</sup> (B, DKO, 2 months),  
481 CXCR5<sup>-/-</sup>.NRF2<sup>-/-</sup> (C, DKO, 4 months) and CXCR5<sup>-/-</sup> (D, KO, 4 months). Endogenous IgG was  
482 detected by omitting primary antibody and visualized by anti-mouse IgG secondary antibody  
483 conjugated with Cy5 (E-H). Autofluorescence (Alexa 488) and IgG (Cy5) were on the middle column.  
484 Phase-contrast images of section morphology shown on the left column. White squares denote the  
485 enlarged areas of the corresponding fluorescent images. Retinal layers denoted as follows:



486 GCL: ganglion cell layer. IPL: inner plexiform layer. INL: inner nuclear layer. OPL: outer plexiform  
487 layer. ONL: outer nuclear layer. PIS: photoreceptor inner segment. POS: photoreceptor outer segment.  
488 RPE: retinal pigment epithelium. BM: Bruch's membrane. CHO: choroid. (I) The Western blots  
489 results of endogenous IgG from RPE/choroid (left panel) and retina (right panel) heavy (HC) and light  
490 chains (LC).  $\beta$ -actin used as loading control.

491 **Figure 4.** Increased  $\beta$  amyloid and  $\alpha$ B-crystallin depositions at the RPE and sub-RPE spaces of the  
492 adult  $CXCR5^{-/-}.NRF2^{-/-}$  mice. Immunofluorescence (IF) staining for  $\beta$  amyloid was performed on the  
493 sections prepared from C57B6/J WT mice (A, 2 months);  $CXCR5^{-/-}.NRF2^{-/-}$  DKO mice (B, 2 and C,  
494 4 months); and  $CXCR5^{-/-}$  KO (D 4 months) old mice; as well as on the RPE/BM/choroid/sclera flat  
495 mounts of the 6-month-old WT (E), DKO (F) and KO mice. Same groups of sections and flat mounts  
496 stained for  $\alpha$ B-crystallin (H-N). White squares denote the enlarged areas of the corresponding  
497 fluorescent images. Retinal layers were denoted as follows: INL, inner nuclear layer; OPL, outer  
498 plexiform layer; ONL, outer nuclear layer; PIS, photoreceptor inner segment; POS, photoreceptor  
499 outer segment; RPE, retinal pigment epithelium; CHO, choroid.

500 **Figure 5.** Increased apolipoprotein E and complement 5b-9 depositions at the RPE and sub-RPE  
501 spaces of the adult  $CXCR5^{-/-}.NRF2^{-/-}$  mice. Immunofluorescence (IF) staining for apolipoprotein E  
502 (APOE) was performed on the sections prepared from C57B6/J WT mice (A, 2 months);  $CXCR5^{-/-}$   
503  $.NRF2^{-/-}$  DKO mice (B, 2 and C, 4 months); and  $CXCR5^{-/-}$  KO (D 4 months) old mice; as well as on  
504 the RPE/Choroid/Sclera flat mounts of the 6-month-old WT (E), DKO (F) and KO mice. Same groups  
505 of sections and flat mounts stained for complement 5b-9 (C5b-9) (H-N). White squares denote the  
506 enlarged areas of the corresponding fluorescent images. Retinal layers were denoted as follows: GCL,  
507 ganglion cell layer; IPL, inner plexiform layer; INL, inner nuclear layer; OPL, outer plexiform layer;  
508 ONL, outer nuclear layer; PIS, photoreceptor inner segment; POS, photoreceptor outer segment; RPE,  
509 retinal pigment epithelium; CHO, choroid.

510 **Figure 6.** Elevated AMD-associated proteins and reduced RPE zonula occludens-1 (ZO-1) protein  
511 levels in the adult  $CXCR5^{-/-}.NRF2^{-/-}$  mice. Immunostaining for ZO-1 were made in RPE/  
512 /Choroid/Sclera flat mounts from specimens obtained from 6-month-old C57BL6 WT mice (A),  
513  $CXCR5^{-/-}.NRF2^{-/-}$  DKO mice (B), and  $CXCR5^{-/-}$  KO mice (C). Note that ZO-1 immunostaining  
514 intensity of the DKO mice was lower than that of WT and KO mice and that hexagonal-shaped RPE  
515 showed abnormalities in the DKO mice (top area in panel B). Western blot analysis of ZO-1;  
516 complement 5b-9 (C5b-9); apolipoprotein E (APOE), Transmembrane Protein 119 (TMEM119);



517 heavy (HC) and light chains (LC) IgG; (D) and  $\beta$ -amyloid (E) in RPE/BM/Choroid protein extracts  
518 prepared from C57B6/J (WT; 4 months), CXCR5<sup>-/-</sup>.NRF2<sup>-/-</sup> (DKO; 2, 4, 6 months) and CXCR5<sup>-/-</sup> (KO;  
519 6 months) old mice.  $\beta$ -actin used as loading control.

520 **Figure 7.** Accelerated retinal degeneration and cell apoptosis in the adult CXCR5<sup>-/-</sup>.NRF2<sup>-/-</sup> mice. The  
521 6-month-old C5BL6 WT mice, CXCR5<sup>-/-</sup> KO mice, and CXCR5<sup>-/-</sup>.NRF2<sup>-/-</sup> DKO mice retinal  
522 flatmounts were used for staining and quantification. (A-D) Retinal flatmounts stained with peanut  
523 agglutinin (PNA) lectin (A), MAP2 (B), cleaved caspase 3 at the ganglion cell layer (C) and the  
524 photoreceptor cell layer depth (D). The quantitative results of PNA lectin (+) photoreceptors (E),  
525 MAP2 (+) retinal ganglion cells (F). Caspase 3 (+) ganglion cells layer (G), and Caspase 3 (+)  
526 photoreceptor layer depths (H). The values of cell numbers per 100  $\mu\text{m}^2$  were averaged from 4 retinal  
527 samples (n = 4). *P* values were denoted: n.s. *P*>0.05; \**P* <0.05; \*\**P* <0.01; \*\*\**P* <0.001.

528

## 529 **Declarations**

## 530 **Acknowledgments**

531 The authors would like to acknowledge the following contributors: Allen Raye (University of  
532 Missouri Department of Biomedical Sciences, Columbia, Missouri, USA) and Lijuan Fan (University  
533 of Missouri, Columbia, Missouri, USA) for assistance with animal resources; Molecular Cytology  
534 core (University of Missouri, Columbia, Missouri, USA) for technical assistance with confocal  
535 imaging; Ms. Sharon Morey (University of Missouri, Department of Ophthalmology Columbia,  
536 Missouri, USA) for editing the manuscript; Ms. Catherine Brooks J. (University of Missouri,  
537 Department of Ophthalmology Columbia, Missouri, USA) for “masked” quantification and additional  
538 language corrections.

## 539 **Funding**

540 Dr. Hu Huang’s research was supported by NIH grant R01 EY027824 and Missouri University start-  
541 up funds.

## 542 **Availability of data and materials**

543 All data generated and analyzed in the current study are included in this published article and its  
544 supplementary information. Breeding pairs of Cxcr5<sup>-/-</sup>.Nrf2<sup>-/-</sup>.Rd8<sup>wt/wt</sup> mice can be provided upon  
545 reasonable request to the corresponding author.

546 **Authors' Contributions**

547 The study was conceived and designed by H.H. and A.L.; H.H. and A.L. performed animal breeding  
548 and genotyping; H.H. and A.L. performed *in vitro* and *in vivo* experiments and evaluations. The  
549 manuscript was written by H.H. and A.L. and critically revised by H.H. Both authors reviewed and  
550 accepted the final version of the manuscript.

551 **Ethics approval**

552 All experiments were approved by the Institutional Animal Care and Use Committee of the University  
553 of Missouri School of Medicine (protocol number: 9520) and were in accordance with the guidelines  
554 of the Association for Research in Vision and Ophthalmology Statement for the use of animals in  
555 ophthalmic and vision research.

556 **Competing interests**

557 The authors declare that they have no competing interests.

558

559

560

561

562

563

564

565

566

567

568

569

570

571 Figure 1

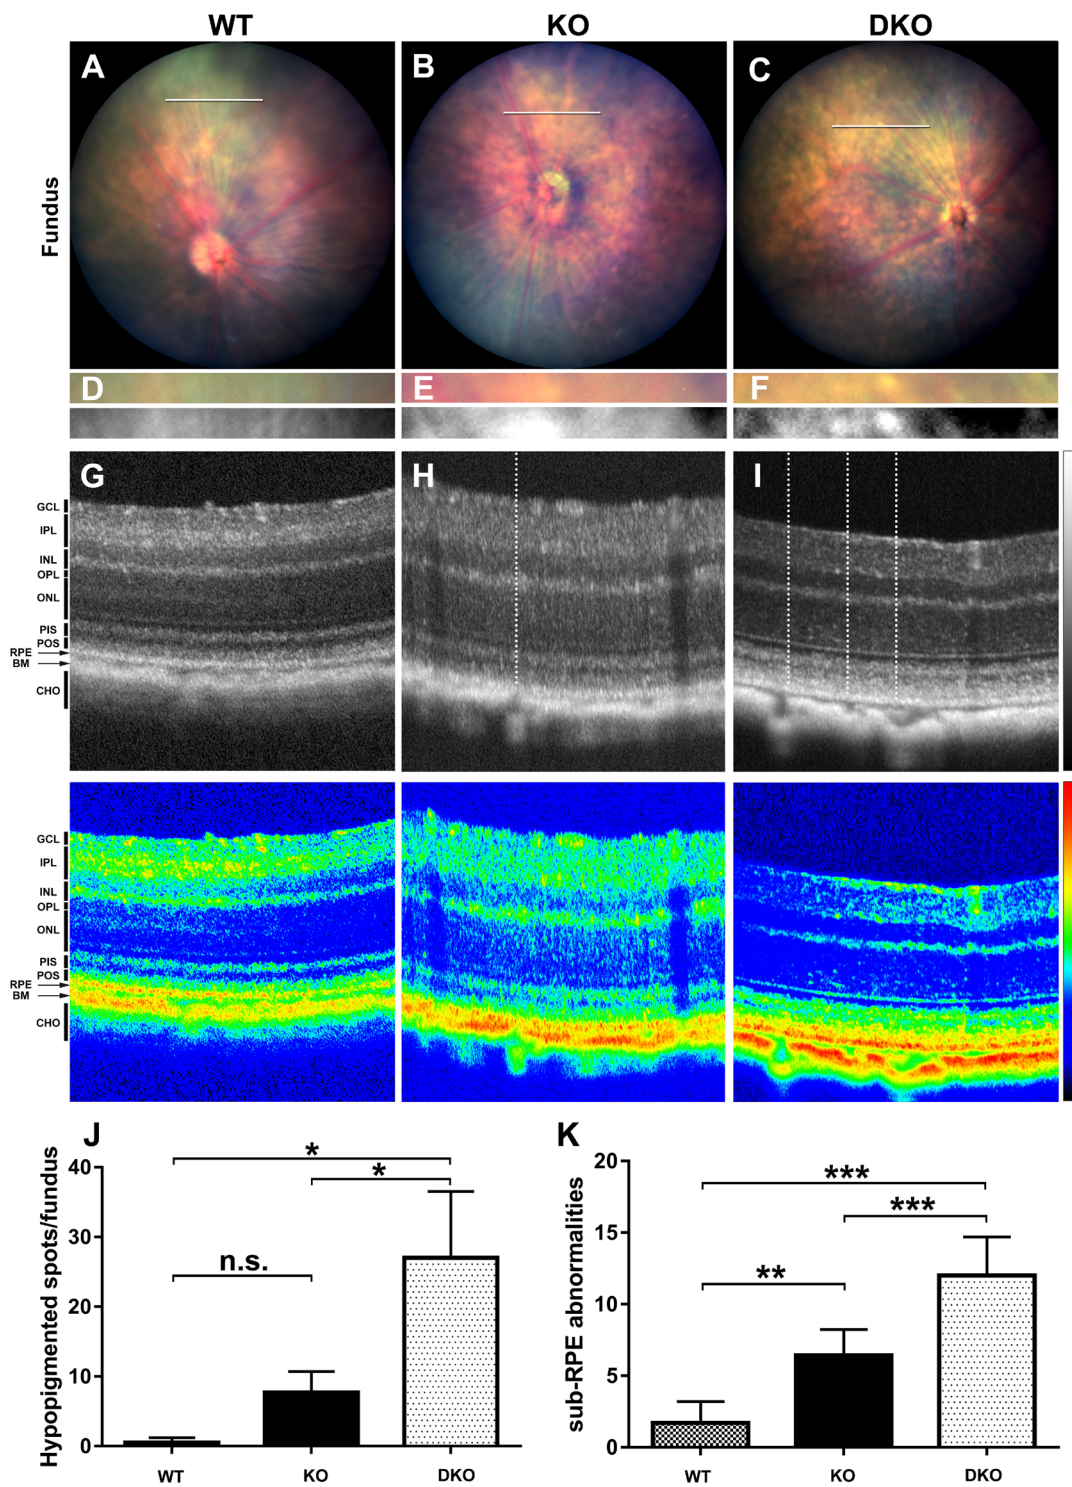

572

573

574

575 Figure 2

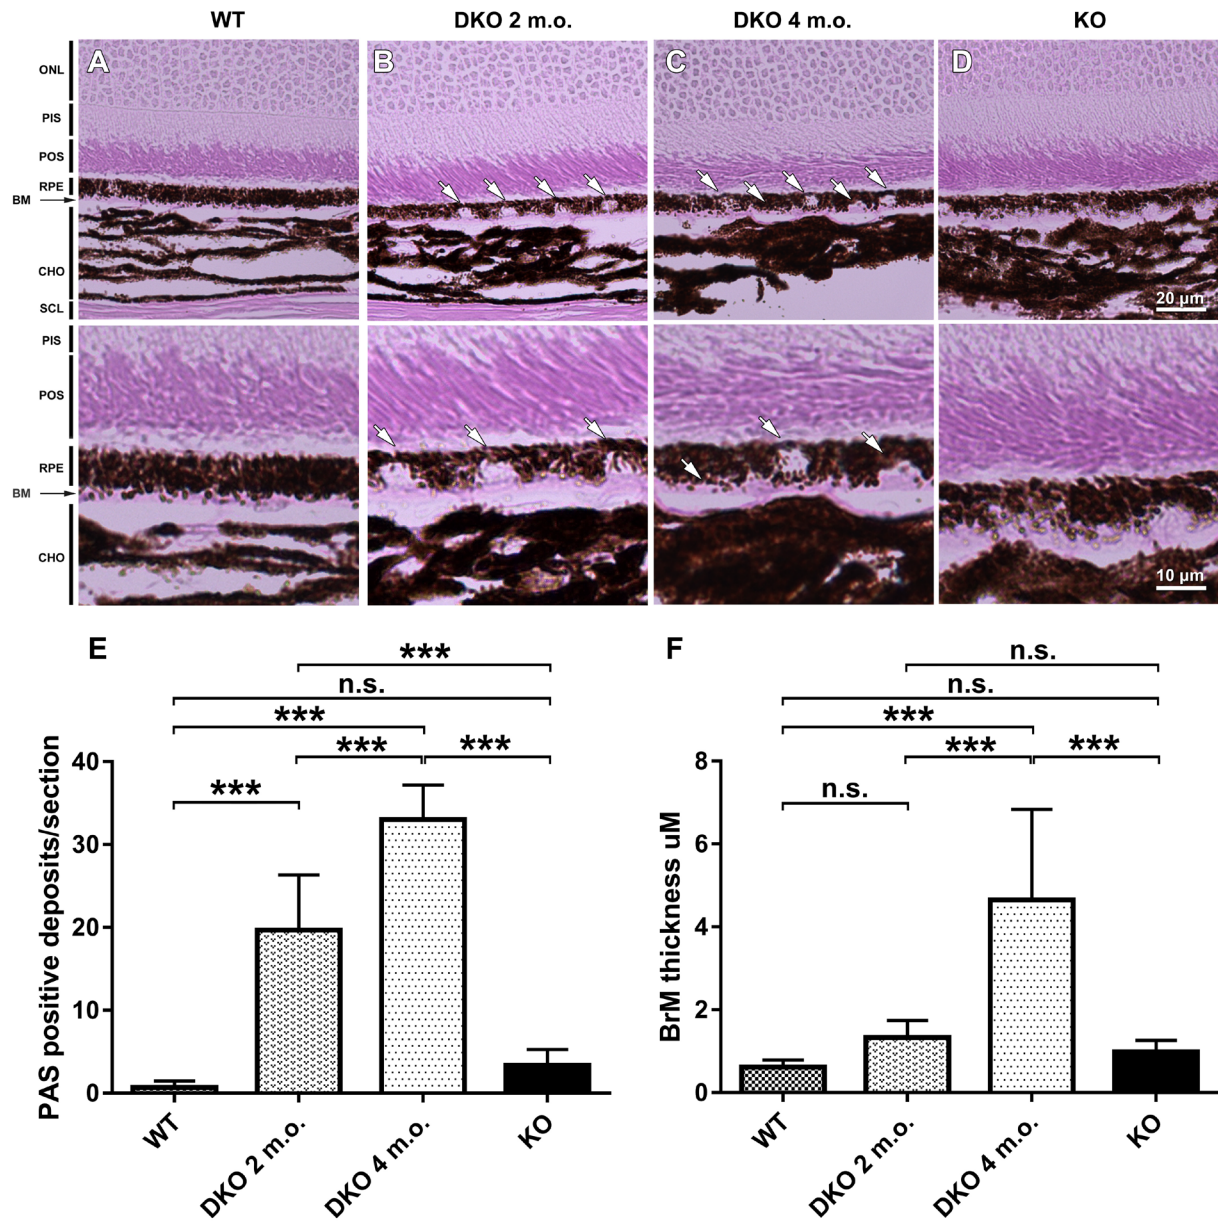

576

577

578

579

580

581



582 Figure 3

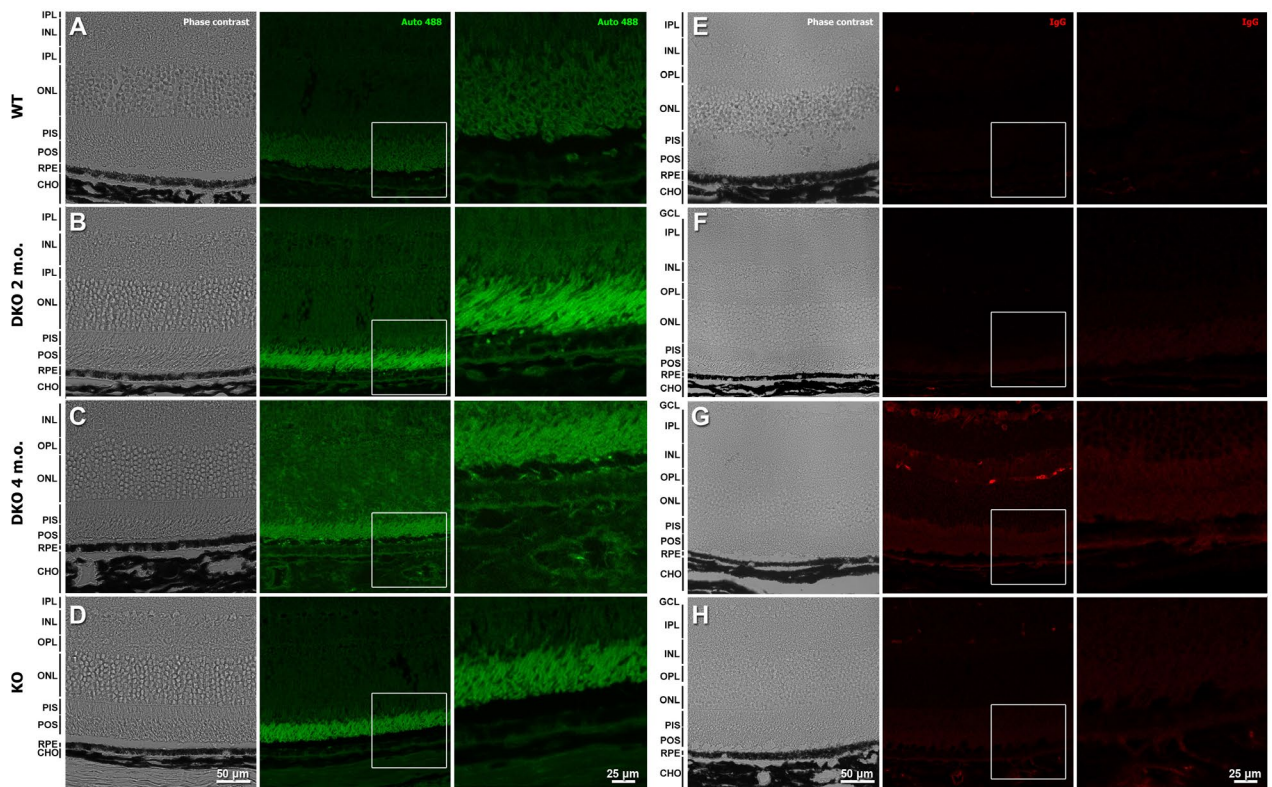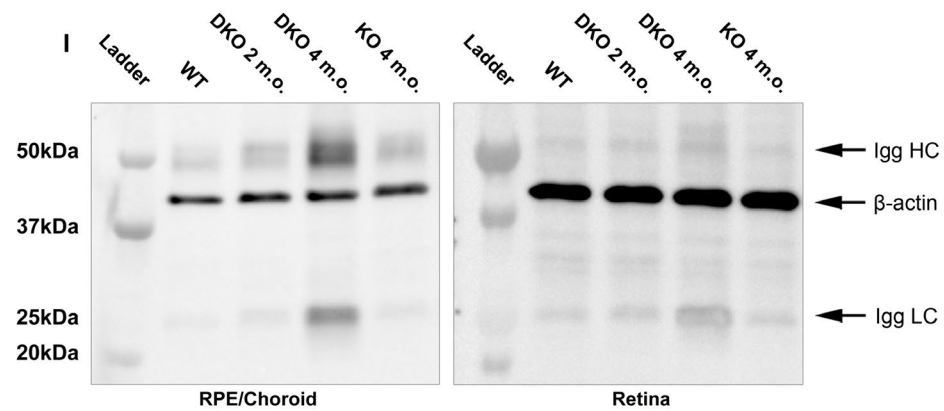

583

584

585

586

587

588

589

590 Figure 4

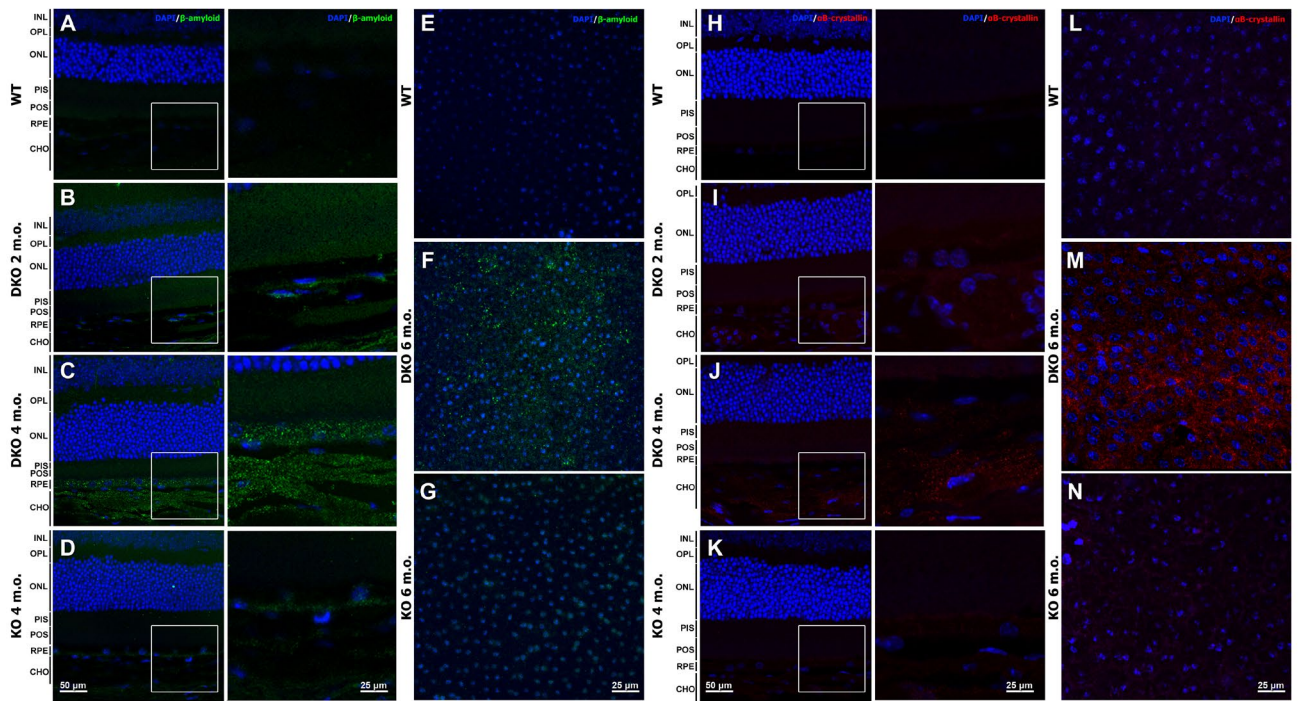

591

592

593

594

595

596

597

598

599

600

601

602

603

604

605 Figure 5

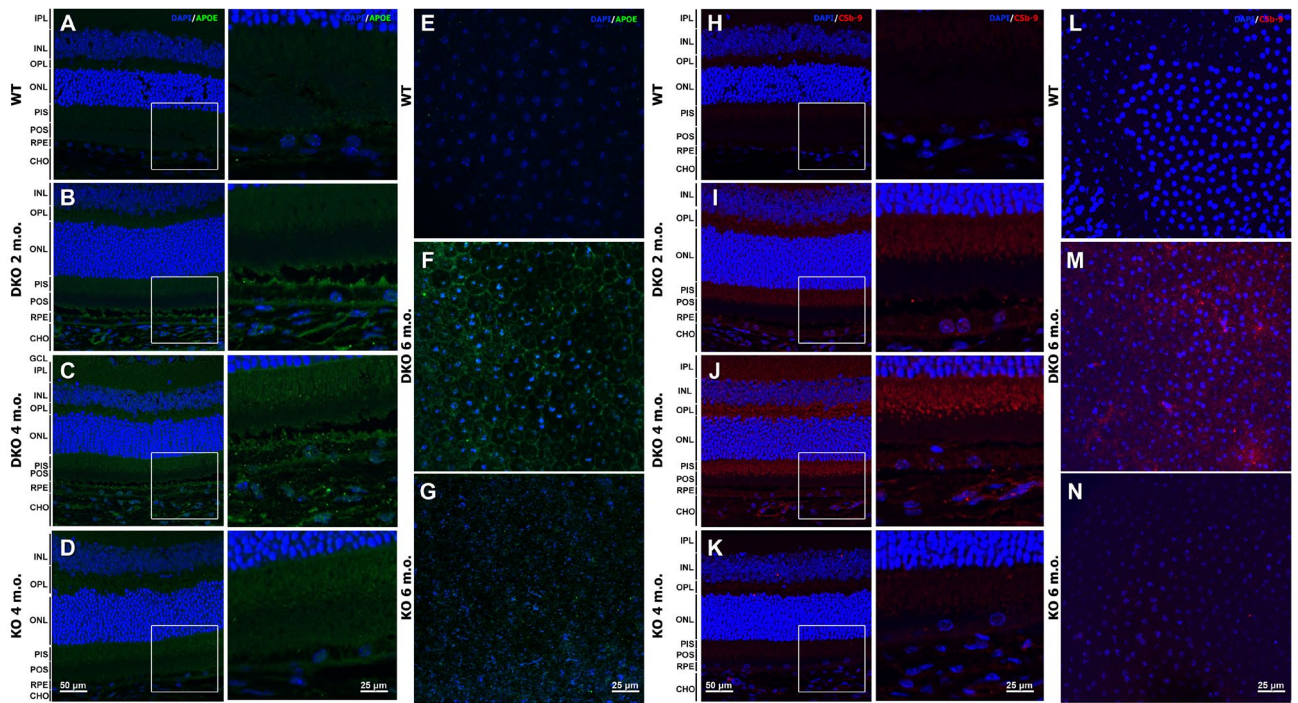

606

607

608

609

610

611

612

613

614

615

616

617

618

619



620 Figure 6

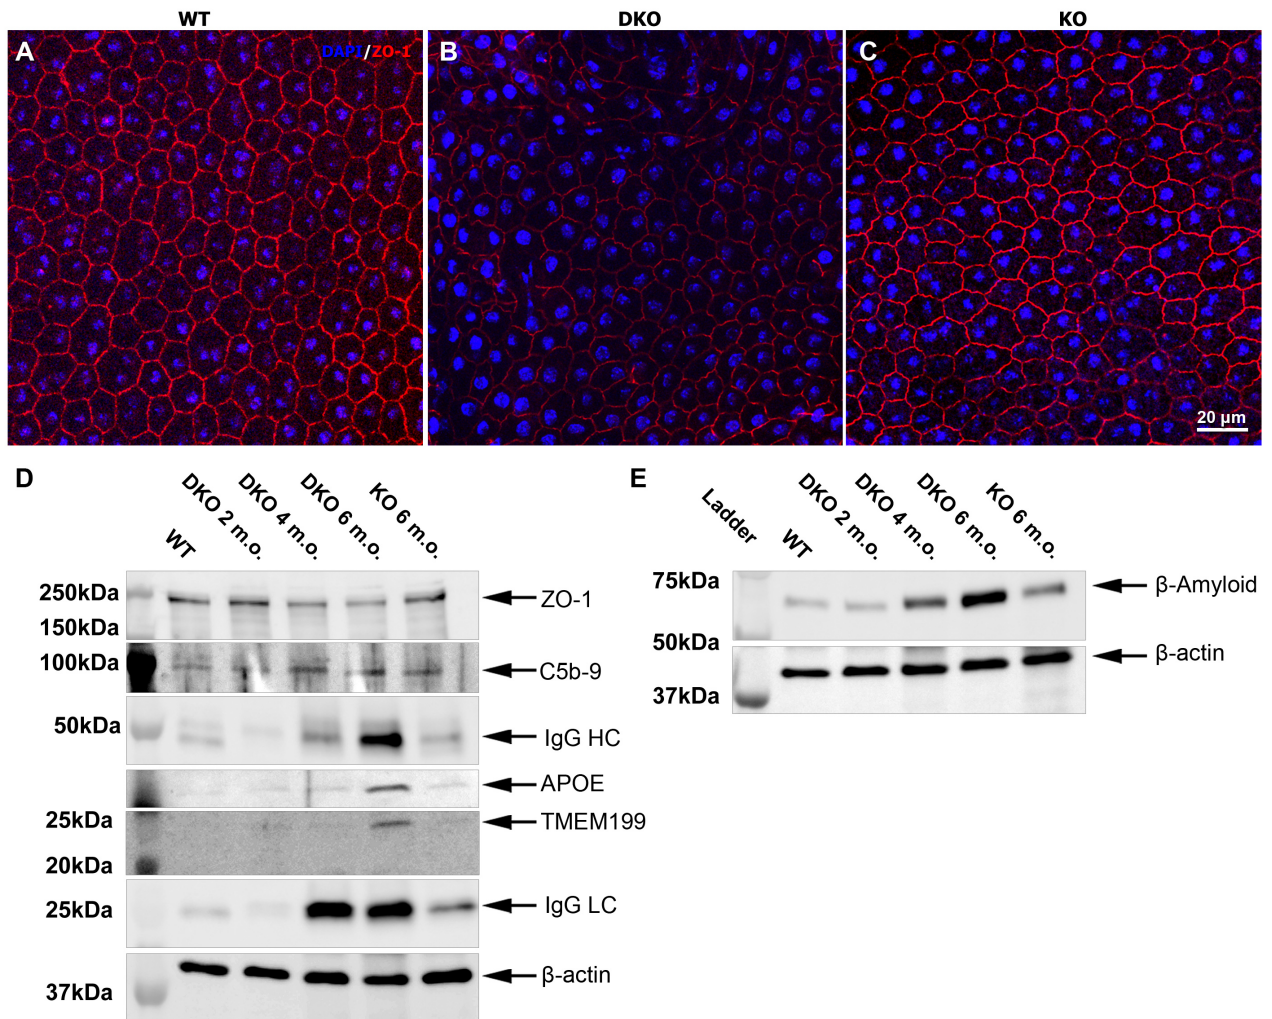

621

622

623

624

625

626

627

628

629



630 Figure 7

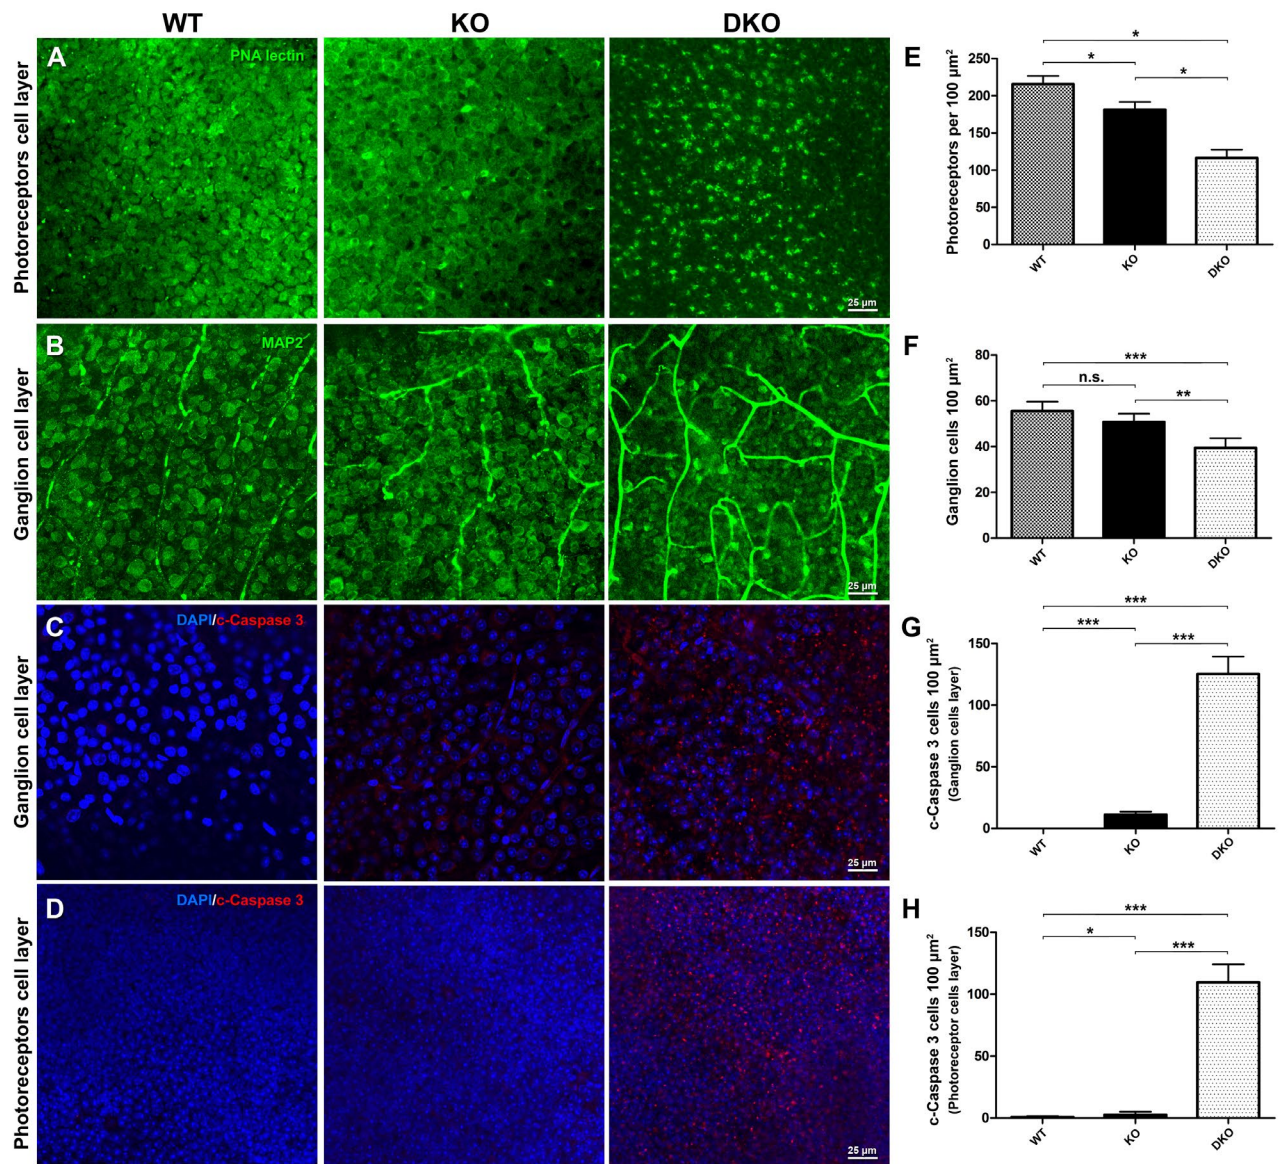

631
